# Supplementary material for: Interplay of MKP-1 and Nrf2 drives tumor growth and drug resistance in non-small cell lung cancer
Source: Aging (Albany NY). 2019 Dec 6;11(23):11329–46. doi: 10.18632/aging.102531 (PMC6932920; doi:10.18632/aging.102531)
Supplement: Supplementary Figures [file aging-11-102531-s002..pdf]

SUPPLEMENTARY FIGURES

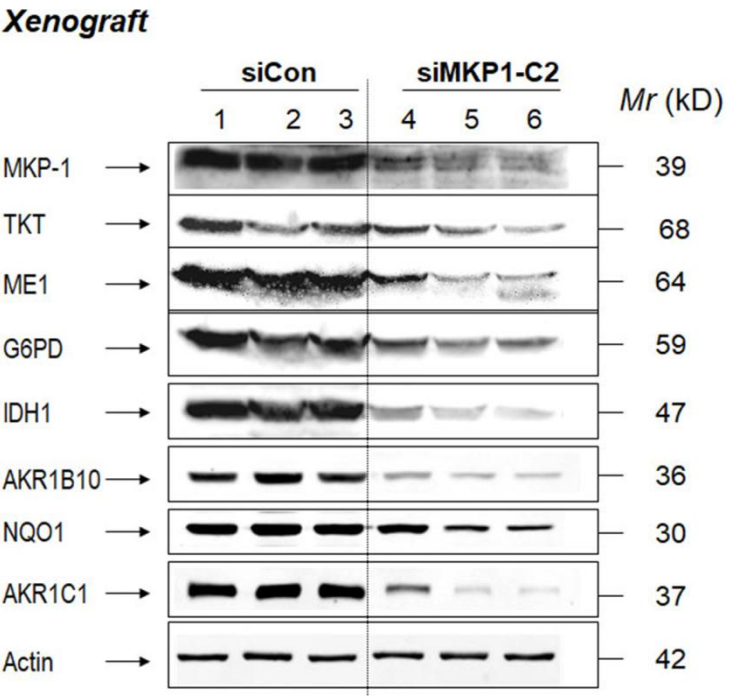

**Supplementary Figure 1. MKP-1 regulates the expression of detoxifying and metabolic enzymes in NSCLC xenograft tumors.** siMKP1-C2 or siCon cells were injected subcutaneously into Nu/Nu mice, and the tumors were removed 6 weeks later. The expression of MKP-1 and ARE-driven genes was determined by Western immunoblotting with antibodies specific to the indicated proteins. Each lane represents a single tumor.

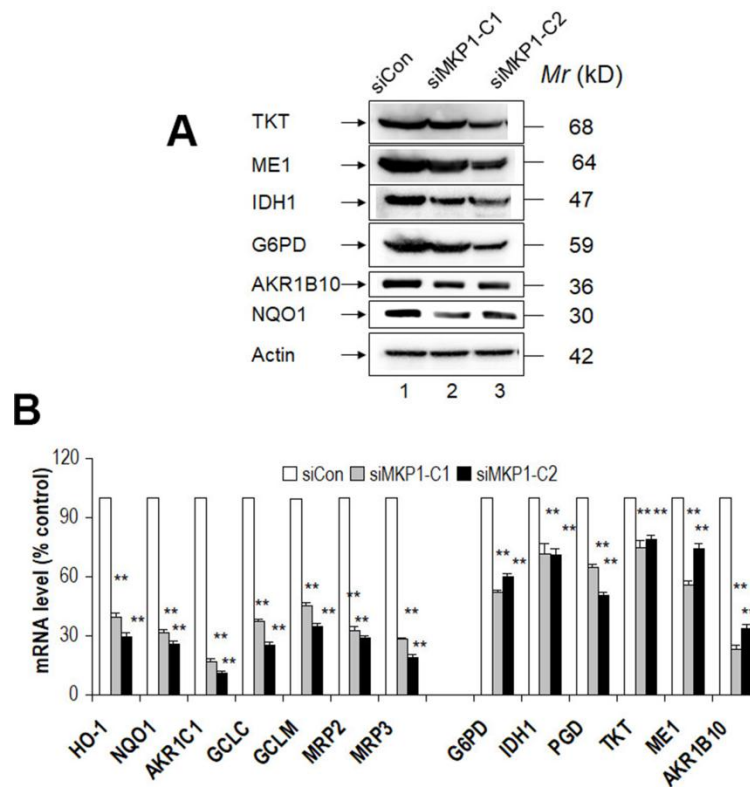

**Supplementary Figure 2. MKP-1 regulates ARE-driven genes in cultured NSCLC cells.** siMKP1-C1, siMKP1-C2, and siCon cells were seeded in 100-mm dishes in triplicate in DMEM plus 10% FBS. Forty-eight hours later the whole cell lysate was extracted from the subconfluent cells, while RNA was harvested from using Trizol (Invitrogen). (A) Expression of Nrf2 target genes TKT, ME1, IDH1, G6PD, AKR1B10, NQO1 in siMKP1-C1, siMKP1-C2, and siCon cells by Western immunoblotting with antibodies against the indicated proteins. Actin was used as a loading control. (B) mRNA levels of the ARE-driven genes analyzed by RT-PCR. The level of 18S rRNA was used as an internal control. The value for siCon was set at 100%. Data are presented as the mean  $\pm$  SD of triplicate experiments. \*\* $p < 0.01$ .
