# Supplementary material for: Interplay of MKP-1 and Nrf2 drives tumor growth and drug resistance in non-small cell lung cancer
Source: publisher site journal article supplement (doi:10.18632/aging.102531), 2019-12-06
Supplement: Supplementary file [file aging-v11i23-102531-supplementary-material-SD2.pdf]

## SUPPLEMENTARY TABLES

**Supplementary Table 1. siRNA, PCR primers, and probes.**

| Primer name                                    | Sequence (5' → 3')                                                                                        |
|------------------------------------------------|-----------------------------------------------------------------------------------------------------------|
| siRNA                                          |                                                                                                           |
| MKP-1<br>(target 1)                            | F: CCAAUUGUCCCAACCAUUUU<br>R: AAAAUGGUUGGGACAAUUGG                                                        |
| MKP-1<br>(target 2)                            | F: GGAGGAUACGAAGCGUUUU<br>R: AAAACGCUUCGUAUCCUCC                                                          |
| MKP-1<br>(target 3)                            | F: GCAUCAUCUCUCCCAACUU<br>R: AAGUUGGGAGAGAUGAUGC                                                          |
| Primers for SYBR® Green RT-PCR assays          |                                                                                                           |
| G6PD                                           | F: TGACCTGGCCAAGAAGAAGA<br>R: CAAAGAAGTCCTCCAGCTTG                                                        |
| IDH1                                           | F: CACTACCGCATGTACCAGAAAGG<br>R: TCTGGTCCAGGCAAAAATGG                                                     |
| ME1                                            | F: CTGCCTGTCATTCTGGATGT<br>R: ACCTCTTACTCTTCTCTGCC                                                        |
| MTHFD2                                         | F: TGCCTCAACAAAACCAGGG<br>R: TTCCTCTGAAATTGAAGCTGG                                                        |
| PGD                                            | F: ATATAGGGACACCACAAGACGG<br>R: GCATGAGCGATGGGCCATA                                                       |
| PPAT                                           | F: CGGTGCCAACATTCAAATC<br>R: TGGTGTGTCCAATTCCAAGA                                                         |
| TKT                                            | F: GCTGAACCTGAGGAAGATCA<br>R: TGTCGAAGTATTTGCCGGTG                                                        |
| AKR1B10                                        | F: 5'-TGTGGGCCTGGGCACTTGGA-3'<br>R: 5'-GGTCCTCCCGCTTCACAGCC-3'                                            |
| Primers and probes for Taqman® RT-PCR analysis |                                                                                                           |
| Nrf2                                           | F: ACTCCCTGCAGCAAACAAGAG<br>R: TTTTCTTAACATCTGGCTTCTTACTTTT<br>Probe: TGGCAATGTTTTCTTGTTC(5'-FAM 3'-BHQ1) |
| MKP-1                                          | F: CACTGCCAGGCAGGCATT<br>R: CTCGATTAGTCCTCATAAGGTAAGCA<br>Probe: CCCGGTCAGCCACCATCTGCC(5'-FAM 3'-TAMRA)   |

**Supplementary Table 2. Correlations of clinicopathological features with overexpression of MKP-1, Nrf2, and HO-1 in 95 patients with NSCLC.**

| Characteristics                     | Cases | MKP-1            |                   | $\chi^2$ | p value        | Nrf2 |      | $\chi^2$ | p value       | HO-1 |      | $\chi^2$ | p value |
|-------------------------------------|-------|------------------|-------------------|----------|----------------|------|------|----------|---------------|------|------|----------|---------|
|                                     |       | Low <sup>‡</sup> | High <sup>†</sup> |          |                | Low  | High |          |               | Low  | High |          |         |
| <b>Age (years)</b>                  |       |                  |                   |          |                |      |      |          |               |      |      |          |         |
| ≤60                                 | 43    | 13               | 30                | 9.253    | <b>0.004**</b> | 11   | 32   | 6.805    | <b>0.012*</b> | 15   | 28   | 0.857    | 0.404   |
| ≥61                                 | 52    | 32               | 20                |          |                | 27   | 25   |          |               | 23   | 29   |          |         |
| <b>Sex</b>                          |       |                  |                   |          |                |      |      |          |               |      |      |          |         |
| Female                              | 52    | 22               | 30                | 1.180    | 0.277          | 17   | 35   | 2.556    | 0.142         | 17   | 35   | 2.556    | 0.142   |
| Male                                | 43    | 23               | 20                |          |                | 21   | 22   |          |               | 21   | 22   |          |         |
| <b>Histological differentiation</b> |       |                  |                   |          |                |      |      |          |               |      |      |          |         |
| Poor                                | 13    | 6                | 7                 | 0.762    | 0.943          | 6    | 7    | 4.159    | 0.474         | 7    | 6    | 7.493    | 0.113   |
| Poor-moderate                       | 53    | 27               | 26                |          |                | 20   | 33   |          |               | 20   | 33   |          |         |
| Moderate                            | 22    | 9                | 13                |          |                | 9    | 13   |          |               | 9    | 13   |          |         |
| Moderate-well                       | 5     | 2                | 3                 |          |                | 1    | 4    |          |               | 0    | 5    |          |         |
| Well                                | 2     | 1                | 1                 |          |                | 2    | 0    |          |               | 2    | 0    |          |         |

\*p <0.05, \*\*p <0.01 (two-tailed)

<sup>†</sup>50% of cancer cells stained

<sup>‡</sup><50% of cancer cells stained
